# Supplementary material
Source: publisher figshare collection journal article supplement (https://geolsoc.figshare.com/ndownloader/files/25616445)
Supplement: Supplementary file 1 [file 25616445]

# Appendix: The Basins and Orogens of the Southern Gulf of Mexico

This map is a compilation of many years work to produce a comprehensive collection of the structural and hydrocarbon elements of this region. The data displayed comes from a multitude of sources ranging from academia, industry, Government, and independent research. Below is a list of the references categorised by type. We hope to have included every reference used but apologise if any have been missed.

## Surface Geology

As this Map is compiled from multiple references, there is a line on the map which denotes the borders at which point the geology changes reference.

Servicio Geológico Mexicano 2006 1:500,000 Geological Map. <https://www.sgm.gob.mx/Gobmx/en/About_SGM/Geology.html>

Campeche, Quintana Roo y Yucatán, 2007. Calleja-Moctezuma, A., Sánchez-Rojas, L.E., and Barajas-Nigoche, L.D. (Map coordinators). Carta Geológica-Minera Estatal Campeche, Quintana Roo, Yucatán, Esc. 1:500,000. Servicio Geológico Mexicano (antes Consejo de Recursos Minerales) Pachuca, Hidalgo, Mexico.

Coahuila, 2005. Montiel-Escobar, J.E., Amezcua-Torres, N., Arnaldo-Reyes, N., Maldonado-Lee, J.M, Aranda-Osorio, J.N., and Santiago-Carrasco, B. (Map coordinators). Geological-Mining Charter Coahuila State, Esc. 1: 500,000. Servicio Geológico Mexicano (antes Consejo de Recursos Minerales) Pachuca, Hidalgo, Mexico.

Chiapas y Tabasco, 2006. Calleja-Moctezuma, A., Sánchez-Rojas, L.E., and Barajas-Nigoche, L.D. (Map coordinators). Carta Geológica-Minera Estatal Chiapas y Tabasco, Esc. 1:500,000. Servicio Geológico Mexicano (antes Consejo de Recursos Minerales) Pachuca, Hidalgo, Mexico.

Hidalgo, 2007. López-Reyes, J.E., and Calleja-Moctezuma, A. (Map coordinators). Carta Geológica-Minera Estatal Hidalgo, Esc. 1:500,000. Servicio Geológico Mexicano (antes Consejo de Recursos Minerales) Pachuca, Hidalgo, Mexico.

Nuevo-León, 2006. Arnaldo-Reyes, N., Maldonado-Lee, J.M, Amezcua-Torres, N., and Calleja-Moctezuma, A. (Map coordinators). Carta Geológica-Minera Nuevo Leon, Esc. 1:500,000. Servicio Geológico Mexicano (antes Consejo de Recursos Minerales) Pachuca, Hidalgo, Mexico.

Oaxaca 2009. Montiel-Escobar, J.E., Bastida-Jiménez, R., Aranda-Osorio, J.N. and Salgadi., E. D. (Map coordinators). Carta Geológica-Minera Estatal Oaxaca, Esc. 1:500,000. Servicio Geológico Mexicano (antes Consejo de Recursos Minerales) Pachuca, Hidalgo, Mexico.

Puebla y Tlaxcala 2006. Montiel-Escobar, J.E., López-Reyes, J.E., Calleja-Moctezuma, A., Aranda. J.N, and Jimenex, R.B. (Map coordinators). Carta Geológica-Minera Estatal Puebla y Tlaxcala, Esc. 1:500,000. Servicio Geológico Mexicano (antes Consejo de Recursos Minerales) Pachuca, Hidalgo, Mexico.

San Luis Potosí 2006. Maldonado-Lee, J.M., Arnaldo-Reyes, N., Calleja-Moctezuma, A., Barajas-Nigoche, L.D and Montiel-Escobar, J.E (Map coordinators). Carta Geológica-Minera Estatal San Luis Potosí, Esc. 1:500,000. Servicio Geológico Mexicano (antes Consejo de Recursos Minerales) Pachuca, Hidalgo, Mexico.

Tampaulipas, 2006. Arnaldo-Reyes, N., Maldonado-Lee, J.M, Amezcua-Torres, N., and Calleja-Moctezuma, A. (Map coordinators). Carta Geológica-Minera Estatal Tamaulipas, Esc. 1:500,000. Servicio Geológico Mexicano (antes Consejo de Recursos Minerales) Pachuca, Hidalgo, Mexico.

Veracruz, 2005. López-Reyes, J.E., Montiel-Escobar, J.E., Amezcua-Torres, N., Arnaldo-Reyes, N., Maldonado-Lee, J.M, Calleja-Moctezuma, A., Aranda-Osorio, J.N., and Bastida-Jiménez, R. (Map coordinators). Carta Geológica-Minera Estatal Veracruz, Esc. 1:500,000. Servicio Geológico Mexicano (antes Consejo de Recursos Minerales) Pachuca, Hidalgo, Mexico.

Padilla y Sánchez, R.J., Domínguez Trejo, I., López Azcárraga, A.G., Mota Nieto, J., Fuentes Menes, A.O., Rosique Naranjo, F., Germán Castelán, E.A., Campos Arriola, S.E., 2013, National Autonomous University of Mexico Tectonic Map of Mexico GIS Project, American Association of Petroleum Geologists GIS Open Files series. <http://www.datapages.com/gis-map-publishing-program/gis-open-files/geographic/tectonic-map-of-mexico-2013>

Stoeser, D.B., Green, G.N., Morath, L.C., Heran, W.D., Wilson, A.B., Moore, D.W., and Van Gosen, B.S. 2005. Preliminary Integrated Geologic Map Databases for the United States Central States: Montana, Wyoming, Colorado, New Mexico, Kansas, Oklahoma, Texas, Missouri, Arkansas, and Louisiana. The State of Texas: USGS Open-File Report 2005-1351, US Geological Survey, Denver, CO. Scale – 1:100,000 to 1:1,000,000. https://pubs.usgs.gov/of/2005/1351/

French, C.D. and Schenk, C.J., 2004, Map showing geology, oil and gas fields, and geologic provinces of the Caribbean Region: U.S. Geological Survey Open-File Report 97-470-K, https://doi.org/10.3133/ofr97470K.

## Cultural Data

Maritime Boundaries: CC BY 4.0 Flanders 2019 Maritime Boundaries Geodatabase: Maritime Boundaries and Exclusive Economic Zones (200NM), version 11. Available online at http://www.marineregions.org/. https://doi.org/10.14284/386. No changes have been made to the original data file

Cities: World Cities, ESRI feature service, source credits Esri, CIA World factbook, GMI, NIMA, Times Atlas 10th.

Well Locations, Oil and Gas Fields: Comisión Nacional de Hidrocarburos - Gobierno de México, National Hydrocarbons Information Centre, https://hidrocarburos.gob.mx/

GEBCO, 2015. The GEBCO_2014 Grid, version 20150318. Available online at <http://www.gebco.net>.

DSDP and ODP expedition locations have been included (where possible). The original database can be downloaded from <http://iodp.tamu.edu/scienceops/maps.html>

Rivers: The ‘Rivers’ feature class is composed of vector data from the Digital Chart of the World (DCW). The data was downloaded from Hijmans et al.’s (2012) DIVA-GIS website: http://www.diva-gis.org/gdata

## Geology

### Cenotes and Impact Rings:

Gulick, S., Barton, P., Christeson, G., Morgan, J., McDonald, M., Mendoza-Cervantes, K., Pearson, Z., Surendra, A., Urrutia-Fucugauchi, J., Vermeesch, P., and Warner, M., 2008. Importance of pre-impact crustal structure for the asymmetry of the Chicxulub impact crater. Letters to Nature, 1, 131-135. <https://doi.org/10.1038/ngeo103>

Sanford, J.C., Snedden, J.W., and Gulick, S.P.S., 2016. The Cretaceous Paleogene boundary deposit in the Gulf of Mexico: Large-scale oceanic basin response to the Chicxulub impact. J. Geophys. Res. Solid Earth, 121, 1240–1261. http://dx.doi.org/10.1002/2015JB012615

### Seeps:

CNH 2015 (d). Gulf of Mexico – Deep Water – North Sector. Perdido Fold belt Subsalt belt Mexican Ridges Petroleum geological synthesis December 2015. [Accessed online: December 2015].

Ding, F., Spiess, V., MacDonald, I.R., Brüning, M., Fekete, N. & Bohrmann, G. 2010. Shallow sediment deformation styles in north-western Campeche Knolls, Gulf of Mexico and their controls on the occurrence of hydrocarbon seepage, Marine and Petroleum Geology, 27, 959-972. <https://doi.org/10.1016/j.marpetgeo.2010.01.014>

Holguin Quiñones, N., Brooks, J.M., Bernard, B.B., Rosenfeld, J., Zumberge J.E., and de Farago Botella, M., 2001. Oil and Gas Seepage in the Southern Gulf of Mexico: Regional Studies of Oil Generation, Charge and Source. <https://www.tdi-bi.com/our_publications/HolguinMS_Revised-gw.pdf>

MacDonald, J.R., Bohrmann, G., Escobar, E., Abegg, F., Blanchon, P., Blinova, V., Bruckmann, W., Drews, M., Eisenhauer, A., Han, X., Heeschen, K., Meier, F., Mortera, C., Naehr, T., Orcutt, B., Bernard, B., Brooks, J., and de Farago, M., 2004. Asphalt volcanism and chemosynthetic life in the Campeche Knolls, Gulf of Mexico, SCIENCE, 304, 999-1002. <http://www.jstor.org/stable/3836973>

Macías Zamora E. 2007. Estilos Estructurales en el Golfo de México Frentre a la Costa de Tamaulipas, Resúmenes Simposio AMGP Delegación Tampico, Evaluación de Plays: Hábitat de Hidrocarburos, 8-9th November 2007 Tampico, Tamaulipas, 15-23.

Mano, M., Beisl, C., and Soares, C. 2017. Oil Seeps on the Seafloor of Perdido, Mexico. Search and Discovery Article #30493. <http://www.searchanddiscovery.com/pdfz/documents/2017/30493mano/ndx_mano.pdf.html>

Saunders, M., Geiger, L., Rodriguez, K., and Hargreaves, P. 2016. The Delineation of Pre-Salt License Blocks in the Deep Offshore-Campeche-Yucatan Basin. Search and Discovery Article #10867. <http://www.searchanddiscovery.com/pdfz/documents/2016/10867saunders/ndx_saunders.pdf.html>

Scholz-Böttcher, B.M., Ahlf, S., Vazquez-Gutierrez, F. & Rullkötter, J. 2008. Sources of hydrocarbon pollution in surface sediments of the Campeche Sound, Gulf of Mexico, revealed by biomarker analysis, Organic Geochemistry, 39, 1104-1108. <https://doi.org/10.1016/j.orggeochem.2008.01.004>

Williams, A., King, M., Lawrence, G. & Roelofsen, J. 2006. Exploring for deepwater petroleum systems with satellite SAR (Synthetic Aperture RADAR). Fact or Fiction? Comparing results from two of today’s hotspots (Congo and Santos) with two of tomorrow’s, AAPG Search and Discovery [Poster 1] [Poster 2] [Poster 3]. http://www.searchanddiscovery.com/documents/2006/06100williams/index.htm

### **Holocene Volcanics:**

Siebert L, and Simkin T, 2002-. Volcanoes of the World: an Illustrated Catalog of Holocene Volcanoes and their Eruptions. Smithsonian Institution. Global Volcanism Program Digital Information Series, GVP-3, (<http://www.volcano.si.edu/>)

### **Folds:**

Ambrose, W.A., Wawrzyniec, T.F, Fouad, K., Sakurai, S., Jennette, D.C., Guevara, E., Talukdar, S., Aranda, M., Alvarado, J., Hernandez, U., Macias, E., Velez, D., Sanchez, F., Lopez, G., and Flores, J., 2004. Stratigraphic architecture of lower Miocene deepwater slope-channel and levee systems, Tuxpan Platform and adjacent area, offshore continental shelf, Gulf of Mexico, Transactions - Gulf Coast Association of Geological Societies, 54, 1-10. <http://archives.datapages.com/data/gcags/data/054/054001/001.htm>

Andreani, L., Rangin, C., Martínez-Reyes, J., Le Roy, C., Aranda-García, M., Le Pichon, X., and Peterson-Rodriguez, R., 2008(b). The Neogene Veracruz fault: evidences for left-lateral slip along the southern Mexico block. Bulletin de la Societe Geologique de France, 179 (2), 195-208. <http://dx.doi.org/10.2113/gssgfbull.179.2.195>

Berlaine, O.F., 2011. Deformacion por acortamiento en la platforma Valles-San Luis Potosi y en la Cuenca Tampico-Misantla; porcion externa del cinturon de pliegues y cabalgaduras Mexicano, Universidad Nacional Autonoma de Mexico, Thesis, 116p.

CNH 2014(c). Shale Gas in Mexico, Eagle Ford Consortium, Texas Binational Sub-Committee. CNH, Laredo, Texas January 29, 2014. <https://www.tamiu.edu/binationalcenter/documents/GCDVLAREDOPRESENTACIONCOMITEBINACIONALENERO282013vf.pdf>

CNH 2015. Gulf of Mexico – Deep Water – North Sector. Perdido Fold belt Subsalt belt Mexican Ridges Petroleum geological synthesis December 2015. [Accessed online: December 2015].

Cobbold, P., and Szatmari, P., 1991. Radial gravitational gliding on passive margins, Tectonophysics, 188, 249-289. <http://dx.doi.org/10.1016/0040-1951(91)90459-6>

Colmenares, M. 2014. The Perdido and Southwestern Gulf of Mexico, AAPG Search and Discovery Article, #30331. <http://www.searchanddiscovery.com/pdfz/documents/2014/30331colmenares/ndx_colmenares.pdf.html>

Ding, F. 2008. Near-surface sediment structures at cold seeps and their physical control on seepage: A geophysical and geological study in the southern Gulf of Mexico and at the frontal Makran Accretionary Prism/Pakistan, PhD Thesis Dissertation, Universität Bremen. <http://elib.suub.uni-bremen.de/diss/docs/00011331.pdf>

Ferket, H., Swennen, R., Ortuño-Arzate, S., Roure, F., 2006. Fluid flow evolution in petroleum reservoirs with a complex diagenetic history: an example from Veracruz, Mexico. Journal of geochemical Exploration 89, 108–111. http://dx.doi.org/10.1016/j.gexplo.2005.11.040

Fitz-Dias, E., Lawton, T.F., Juarez-Arriaga, E., and Chavez-Cabello, G., 2017. The Cretaceous-Paloegene Mexican orogen: structure, basin development, magmatism and tectonics. Earth Science Reviews, Volume 183, Pages 56-84 https://doi.org/10.1016/j.earscirev.2017.03.002

Galindo-Ixpango, F.A., 2010. Evaluacion petrolera y metodos de explotacion en Cuenca de Sabinas, Coahuila, Universidad Nacional Autonoma de Mexico, Thesis, 265p. http://www.ptolomeo.unam.mx:8080/jspui/bitstream/132.248.52.100/1270/1/Tesis.pdf

Gryger, S.M.B.S., 2010. Geologic framework of the Sierra Mojada mining district, Coahuila, Mexico: an integrative study of a Mesozoic platform-basin margin, Thesis, University of Texas at Austin, 399p. <http://repositories.lib.utexas.edu/handle/2152/ETD-UT-2010-12-2637>

Gómez-Cabrera, P.T. & Jackson, M.P.A. 2009. Regional Neogene Salt Tectonics in the offshore Salina del Istmo Basin, southeastern Mexico, AAPG Memoir, 90, 1-28. <http://archives.datapages.com/data/specpubs/memoir90/CHAPTER01/CHAPTER01.HTM>

Hackley, P.C., 2012. Geological and geochemical characterization of the Lower Cretaceous Pearsall Formation, Maverick Basin, South Texas: A future shale gas resource? AAPG Bulletin, 96 (8), 1449-1482. <http://dx.doi.org/10.1306/11221111071>

Hanson, A.D., 2014. A surprising asymmetric paleithermal anomaly around El Gordo diapir, La Popa Basin, Mexico, AAPG Bulletin, 98 (2), 213-226. <http://www.dx.doi.org/10.1306/06171312226>

Hernández-Vergara, R., Fitz-Díaz, E., Brocard, G., and Morán-Zenteno, D.M., 2020. Illite40Ar-39Ar dating of Eocene deformation in the Chiapas Fold and Thrust Belt, southern Mexico. Geological Society, London, Special Publications, 504, 15 July 2020, <https://doi.org/10.1144/SP504-2020-75>

Kuuskraa, V.A., Stevens, S. H. and Moodhe, K. 2013. EIA/ARI World Shale Gas and Shale Oil Resource Assessment, Advanced Resources International Inc. Report, June 2013, Chapter II Mexico pages 112-137. <http://www.adv-res.com/pdf/A_EIA_ARI_2013%20World%20Shale%20Gas%20and%20Shale%20Oil%20Resource%20Assessment.pdf>

Le Roy C., 2007. Déformation crustale néogène et processus gravitaires le long de la marge ouest du Golfe du Mexique. PhD Thesis, CEREGE, Aix-Marseille Univ. https://scanr.enseignementsup-recherche.gouv.fr/publication/these2007AIX30017

Lyons, K. 2018. Mexico Offshore: Illuminating Campeche Complex Structures with Seismic Technology. Extended Abstract, First EAGE Workshop on Deepwater Exploration in Mexico: Foster collaboration to unlock potential, 13-15 May 2018, Cancun, Mexico. <https://www.earthdoc.org/content/papers/10.3997/2214-4609.201800625>

Ortuño-Arzate, S., Ferket, H., Cacas, M.C., Swennen, R. & Roure, F. 2003. Late Cretaceous carbonate reservoirs in the Cordoba Platform and Veracruz Basin, eastern Mexico, in C. Bartolini, R. T. Buffler, and J. Blickwede, (eds)., The Circum-Gulf of Mexico and the Caribbean: Hydrocarbon habitats, basin formation, and plate tectonics: AAPG Memoir, 79, 476-514 (CD-ROM version). https://doi.org/10.1306/M79877C22

PEMEX, 2009. Presente y Futuro de las Estrategias en Exploración y Explotación de Campos en Aguas Profundas, Forum Retos Tecnológicas en Exploración y Explotación de Campos Petroleros en Aguas Profundaas October 15-19th 2009

PEMEX, 2013. Las Reservas de Hidrocarburos de Mexico, 1 de enero de 2013, PEMEX, 125p. https://www.pemex.com/ri/Publicaciones/Reservas%20de%20Hidrocarburos%20Archivos/20130101_r_h_p_e.pdf

PEMEX, 2013. Deepwater field development, Presentation download [Accessed online: December 2014]

Salomón-Mora, L.E., 2013. Structure and tectonics of the salt and shale provinces, Western Gulf of Mexico. PhD Thesis University of Aberdeen. <https://ethos.bl.uk/OrderDetails.do?uin=uk.bl.ethos.619168>

Vallejo, C.A.B. 2017. Atlas Geológico Cuenca de Veracruz. CNH Basin Atlas Publication, 1-52 [Accessed Online: January 2018]. <https://portal.cnih.cnh.gob.mx/downloads/es_MX/info/Atlas_Geologico_Cuenca_Veracruz_V3.pdf>

Wawrzyniec, T.F., Fouad, K., Schultz-Ela, D., Ambrose, W., Jennette, D., Sakurai, S., Guevara, E., Aranda, M., Alvarado, J., Hernandez, U., Macias, E., Roman, J., Rosas, C., Rosas, K, and Salomon, L.E., 2003, Cenozoic deformational styles of the Laguna-Madre-Tuxpan Shelf and Mexican Ridges fold belt, Mexico, Gulf Coast Association of Geological Societies Transactions, 53, 843-854. http://archives.datapages.com/data/gcags/data/053/053001/0846.htm

Witt, C., Rangin, C., Andreani, L., Olaez, N., and Martinez, J., 2012. The transpressive left-lateral Sierra Madre de Chiapas and its buried front in the Tabasco plain (southern Mexico), Journal of the Geological Society, London, 169, 143-155. http://dx.doi.org/10.1144/0016-76492011-024

### **Faults:**

Ambrose, W.A., Wawrzyniec, T.F., Fouad, K., Sakurai, S., Jennette, D.C., Brown Jr., L.F., Guevara, E.H., Dunlap, D.B., Talukdar, S.C., Garcia, M.A., Romano, U.H., Vega, J.A., Zamora, E.M., Ruiz, H.R., and Hernández, R.C., 2005. Neogene tectonic, stratigraphic, and play framework of the southern Laguna Madre-Tuxpan continental shelf, Gulf of Mexico. AAPG Bulletin, 89 (6), 725-751. https://doi.org/10.1306/01140504081

Ambrose, W.A, Fouad, K., Sakurai, S., Jennette, D.C., Brown Jr., L.F., Guevara, E.H., Dunlap, D.B., Wawrzyniec, T.F., Talukdar, S.C., Garcia, M.A., Romano, U.H., Ruiz, H.R., Hernández, R.C., Vega, J.A. & Zamora, E.M. 2009. Neogene tectonics, stratigraphy, and play framework of the southern Laguna Madre-Tuxpan continental shelf. In: Bartolini, C., and Román-Ramos, J (eds.) Petroleum Systems in the Southern Gulf of Mexico, AAPG Memoir, 90, 477-502. https://doi.org/10.1306/13191099M903340

Andreani, L., Le Pichon, X., Rangin, C., and Martínez-Reyes, 2008(a). The southern Mexico Block: main boundaries and new estimation for its Quaternary motion, Bull. Soc. Géol. Fr., 179 (2), 209-223. https://doi.org/10.2113/gssgfbull.179.2.209

Arriaga, H.M. 2008. Caracterización de la Roca Almacén de Edad Cretácico Superior, para la evaluación de los elementos del play brecha-cretácico superior, usando la metodología de plays fairway. MSc Theis, Universidad Nacional Autonoma de Mexico,1-130. http://132.248.52.100:8080/xmlui/handle/132.248.52.100/2589

Berlaine, O.F., 2011. Deformacion por acortamiento en la platforma Valles-San Luis Potosi y en la Cuenca Tampico-Misantla; porcion externa del cinturon de pliegues y cabalgaduras Mexicano, Universidad Nacional Autonoma de Mexico, Thesis, 116p. https://ru.dgb.unam.mx/handle/DGB_UNAM/TES01000668135

Bose, S., and Mitra, S. 2012. Controls of listric normal fault styles in the northern Gulf of Mexico: Insights from experimental models. Marine and Petroleum Geology, 35(1), 41–54. https://doi.org/10.1016/j.marpetgeo.2012.01.012

CNH 2014. Southeast Offshore Basins Shallow Water Area, Petroleum Geological Synthesis, CNH Website. [Accessed online: December 2014].

CNH 2015. Ruling on the Assessment Plan submitted by Hokchi Energy, S.A. de C.V. Contract Area 2. [Accessed online: February 2019].

CNH 2015 (e). Gulf of Mexico – Deep Water – South Sector. Saline Basin Petroleum geological synthesis December 2015. [Accessed online: December 2015]. https://rondasmexico.gob.mx/media/1557/geological-atlas-cs.pdf

CNH, 2016. Contrato CNH-R01-L01-A7/2015, Dictamen del Plan de Exploracion, Area Contractual 7: Operador Talos Energy Offshore Mexico. [Accessed online: January 2019]. https://rondasmexico.gob.mx/esp/contratos/cnh-r01-l01-a72015/

Cobbold, P., and Szatmari, P., 1991. Radial gravitational gliding on passive margins, Tectonophysics, 188, 249-289. https://doi.org/10.1016/0040-1951(91)90459-6

Contreras, J., & Suter, M., 2015. Mechanical stability model of progradational carbonate platform margins under tectonic loads: Deformation of Cretaceous carbonate platforms in the Sierra Madre Oriental fold-thrust belt (east central Mexico). Journal of Geophysical Research: Solid Earth. 120. 1288-1308. http://dx.doi.org/10.1002/2014JB011495

Escalera, J.A. 2017.Pemex Farmouts 2017: Nobilis-Maximino. Presentation, *PEMEX* [Accessed Online: December 2017] http://www.pemex.com/Documents/2017pemexfarmoutday/6.%20Jose%20Antonio%20Escalera%20-%20Deepwater%20Farmout%20-%20Nobilis%20Maximino.pdf

Ferket, H., Swennen, R., Ortuño-Arzate, S., Roure, F., 2006. Fluid flow evolution in petroleum reservoirs with a complex diagenetic history: an example from Veracruz, Mexico. *Journal of geochemical Exploration* **89**, 108–111. http://dx.doi.org/10.1016/j.gexplo.2005.11.040

Gonzalez-Partida, E., Camprubi, A., Canet, C., y Gonzalez-Sanchez, F., 2008. Fisicoquimica de salmueras e hidrocarburos en cuencas petroleras y en depositos minerals tipo Mississippi Valley y asociados, *Boletin de la Sociedad Geologica Mexicana,* **60** (1), 23-42. http://ref.scielo.org/6dx3jt

Guzmán, A.E. & Marquez-Dominguez, B. 2001. The Gulf of Mexico Basin south of the border, In: Downey, M.W., Threet, J.C., and Morgan, W.A., (eds)., Petroleum Provinces of the Twenty-first Century, AAPG Memoir, 74, 337-351. https://doi.org/10.1306/M74775C17

Haenggi, T., 2002. Tectonic history of the Chihuahua Trough, Mexico and adjacent USA, Part II: Mesozoic and Cenozoic. Boletin de la Sociedad Geologica Mexicana, 1, 38-94. http://boletinsgm.igeolcu.unam.mx/bsgm/vols/epoca03/5501/2002-55-1Haenggi%28II%29-L.pdf

Hernández-Mendoza, J.J., Hentz, T.F., DeAngelo, M.V., Wawrzyniec, T.F., Sakurai, S., Talukdar, S.C., and Holtz, M.H., 2008. Miocene chronostratigraphy, paleogeography, and play framework of the Burgos Basin, southern Gulf of Mexico. AAPG Bulletin, 92 (11), 1501-1535. https://doi.org/10.1306/07070808021

Hugo, E.H.O., and Sanchez, D.A., 2012. Cuenca Sabinas, 16 slides. [Accessed Online: December 2017] https://www.scribd.com/doc/94762986/Sabinas

Lawton, T.F., and Pindell, J. 2017. Upper Triassic-Middle Jurassic Strata of Plomosas Uplift and Sierra Samalayuca, Chihuahua, Mexico: Onshore Record of Syn-rift Gulf of Mexico Fault History. *Search and Discovery Article #30505. http://www.searchanddiscovery.com/documents/2017/30505lawton/ndx_lawton.pdf*

Le Roy, C. & Rangin, C., 2008. Cenozoic crustal deformation of the offshore Burgos basin in region (NE Gulf of Mexico). A new interpretation of deep penetration multichannel seismic reflection lines. Bulletin de la Societe Geologique de France, 179 (2), 161-174. https://doi.org/10.2113/gssgfbull.179.2.161

Lyons, K. 2018. Mexico Offshore: Illuminating Campeche Complex Structures with Seismic Technology. Extended Abstract, *First EAGE Workshop on Deepwater Exploration in Mexico: Foster collaboration to unlock potential, 13-15 May 2018, Cancun, Mexico.* https://doi.org/10.3997/2214-4609.201800625

Mandujano-Velazques, J.J., and Keppie, J.D., 2009**.** Middle Miocene Chiapas fold and thrust belt of Mexico: a result of collision of the Tehuantepec Transform/Ridge with the Middle America Trench, *Geological Society, London, Special Publications*,**327**, 55-69. https://doi.org/10.1144/SP327.4

Meyer, D., Zarra, L., Rains, D., Meltz, B., and Hall, T., 2005. Emergence of the Lower Tertiary Wilcox trend in the deepwater Gulf of Mexico, *AAPG Search and Discovery Article #10084. http://www.searchanddiscovery.com/pdfz/documents/2005/meyer/images/meyer.pdf.html*

Ortuño-Arzate, S., Ferket, H., Cacas, M.C., Swennen, R. & Roure, F. 2003. Late Cretaceous carbonate reservoirs in the Cordoba Platform and Veracruz Basin, eastern Mexico, *in* C. Bartolini, R. T. Buffler, and J. Blickwede, (eds.) *The Circum-Gulf of Mexico and the Caribbean: Hydrocarbon habitats, basin formation, and plate tectonics: AAPG Memoir,* **79**, 476-514 (CD-ROM version) https://doi.org/10.1306/M79877C22

PEMEX, 2013. Provincia Petrolera Sureste (Salina del Istmo, Reforma-Akal y Macuspana). Pemex-Exploracion y Production.

PEMEX, 2010. Provincias Geologicas. Subdireccion de Tecnica Exploracion, Pemex. Scale – 1:4,000,000.

PEMEX 2010(e). Evaluacion de las Reservas de Hidrocarburos de enero de 2010, p1-152.

Pindell, J., Weber, B., Hale-Erlich, W., Cossey, S., Bitter, M., Garza, R.M., Graham, R., Erlich, R.N., 2019. Strontium isotope dating of evaporites and the breakways of the Gulf of Mexico and Proto-Caribbean seaway. Geological Society of America 2019 AAPG Annual Convention and Exhibition, San Antonio, Texas, May 19-22 2019. http://www.searchanddiscovery.com/abstracts/html/2019/ace2019/abstracts/1635.html

Rangin C., Le Pichon, X., Flotté, N., Husson, L., Martinez, J. & Calassou, S., 2008. Cenozoic extension in the northern Gulf of Mexico. A new interpretation of multichannel seismic data, Bulletin de la Societe Geologique de France, 179, 2, 117-128. https://doi.org/10.2113/gssgfbull.179.2.117

Rebolledo-Vieyra, M., Urrutia-Fucugauchi, J., López-Loera, H., 2010. Aeromagnetic anomalies and structural model of the Chicxulub multiring impact crater, Yucatan, Mexico, *Revista Mexicana de Ciencias Geológicas*, **27** (1) , 185-195. http://ref.scielo.org/hdycfq

Rogers, R.D., Mann, P., Emmet, P.A., and Venable, M.E., 2007. Colon fold belt of Honduras: Evidence for Late Cretaceous collision between the continental Chortis block and intra-oceanic Caribbean arc, in Mann, P., ed., Geologic and tectonic development of the Caribbean plate in northern Central America: Geological Society of America Special Paper 428, p. 129–149. https://doi.org/10.1130/2007.2428(06)

Ricoy-Paramo, V., 2005. 3D Seismic Characterisation of the Cantarell Field, Campeche Basin, Mexico, Unpublished Thesis, Cardiff University, 424p. http://orca.cf.ac.uk/id/eprint/55148

Sakurai, S., Ambrose, W.A., Jennette, D.C., Holtz, M.H., Dutton, S.P., Fouad, K., Wawrzyniec, T.F., Dunlap, D.B., Guevara, E.H., Gremaldo-Suárez, F.M., Aguilera-Gómez, L.E., Rodríguez-Larios, J.A., 2002. Petrophysical Evaluation of Miocene-Pliocene gas reservoirs: Veracruz and Macuspana Basins, Mexico, *Petrophysics* **44**, 116-125. https://www.onepetro.org/journal-paper/SPWLA-2003-v44n2a4

Salomón-Mora, L.E., 2013. Structure and tectonics of the salt and shale provinces, Western Gulf of Mexico. PhD Thesis University of Aberdeen. https://ethos.bl.uk/OrderDetails.do?uin=uk.bl.ethos.619168

Steier, A., 2018. Jurassic-Cretaceous stratigraphic and structural evolution of the Northern Yucatan margin. Gulf of Mexico Basin. Unpublished MSc thesis, University of Houston. http://hdl.handle.net/10657/3354

Styron, R., Garcia, J., & Marco. P., 2020. CCAF-DB: the Caribbean and Central American active fault database. Natural Hazards and Earth System Sciences. 20. 831-857. https://doi.org/10.5194/nhess-20-831-2020, 2020

Witt, C., Rangin, C., Andreani, L., Olaez, N., and Martinez, J., 2012.The transpressive left-lateral Sierra Madre de Chiapas and its buried front in the Tabasco plain (southern Mexico), *Journal of the Geological Society, London*, **169**, 143-155. http://dx.doi.org/10.1144/0016-76492011-024

Ziga-Rodriguez, G., 1998. Sistemas Petroleros de la Cuenca de Burgos, P.E.P, Informe Inédito.

## **Plate Tectonics:**

Oceanic Fracture zones:

*These are interpreted from Vertical Gravity Gradient and Aeromagnetic data from our own work and also combined with interpretation from Pindell et al. 2016/2020.*

Pindell, J., Ernesto, M.C., Alejandro, C., and Leopoldo, H. 2016. Aeromagnetic Map Constrains Jurassic-Early Cretaceous Synrift, Break Up, and Rotational Seafloor Spreading History in the Gulf of Mexico. 35th Annual GCSSEPM Foundation Perkins-Rosen Research Conference: Mesozoic of the Gulf Rim and Beyond: New Progress in Science and Exploration of the Gulf of Mexico Basin. December 8-9, 2016, 123-153, CD-ROM CD-ROM. https://doi.org/10.5724/gcs.15.35.0123

Pindell, J., Villagómez, D., Molina-Garza, R., Graham R., and Weber, B., 2020. A revised synthesis of the rift and drift history of the Gulf of Mexico and surrounding regions in the light of improved age dating of the Middle Jurassic salt. Geological Society, London, Special Publications, 504. <https://doi.org/10.1144/SP504-2020-43>

Sandwell, D. T., R. D. Müller, W. H. F. Smith, E. Garcia, R. Francis, 2014. New global marine gravity model from CryoSat-2 and Jason-1 reveals buried tectonic structure, Science, Vol. 346, no. 6205, pp. 65-67. http://dx.doi.org/10.1126/science.1258213

Ocean Continental Boundary:

*The ocean continental boundary is an amalgamation of numerous references and our own interpretation using the Vertical Gravity Gradient and Aeromagnetic data and also combined with interpretation from Pindell et al. 2016/2020. References includes*

Hudec, M.R., Jackson, M.P.A., and Peel, F.J., 2013. Influence of deep Louann structure on the evolution of the northern Gulf of Mexico, AAPG Bulletin, 97 (10), 1711-1735. <http://dx.doi.org/10.1306/04011312074>

Leroy, S., de Lépinay, B.M., Mauffret, A., Pubellier, M. 1996. Structural and Tectonic Evolution of the Eastern Cayman Trough (Caribbean Sea) From Seismic Reflection Data. AAPG Bulletin, V. 80, No. 2 (February 1996), P. 222–247.

Pindell, J., Ernesto, M.C., Alejandro, C., and Leopoldo, H. 2016. Aeromagnetic Map Constrains Jurassic-Early Cretaceous Synrift, Break Up, and Rotational Seafloor Spreading History in the Gulf of Mexico. 35th Annual GCSSEPM Foundation Perkins-Rosen Research Conference: Mesozoic of the Gulf Rim and Beyond: New Progress in Science and Exploration of the Gulf of Mexico Basin. December 8-9, 2016, 123-153, CD-ROM. https://doi.org/10.5724/gcs.15.35.0123

Pindell, J., Villagómez, D., Molina-Garza, R., Graham R., and Weber, B., 2020. A revised synthesis of the rift and drift history of the Gulf of Mexico and surrounding regions in the light of improved age dating of the Middle Jurassic salt. Geological Society, London, Special Publications, 504. <https://doi.org/10.1144/SP504-2020-43>

Sandwell, D. T., R. D. Müller, W. H. F. Smith, E. Garcia, R. Francis, 2014. New global marine gravity model from CryoSat-2 and Jason-1 reveals buried tectonic structure, Science, Vol. 346, no. 6205, pp. 65-67. http://dx.doi.org/10.1126/science.1258213

Spreading Centre:

*These are interpreted from Vertical Gravity Gradient and Aeromagnetic data from our own work and also combined with interpretation from Pindell et al. 2016/2020.*

Pindell, J., Ernesto, M.C., Alejandro, C., and Leopoldo, H. 2016. Aeromagnetic Map Constrains Jurassic-Early Cretaceous Synrift, Break Up, and Rotational Seafloor Spreading History in the Gulf of Mexico. 35th Annual GCSSEPM Foundation Perkins-Rosen Research Conference: Mesozoic of the Gulf Rim and Beyond: New Progress in Science and Exploration of the Gulf of Mexico Basin. December 8-9, 2016, 123-153, CD-ROM. <https://doi.org/10.5724/gcs.15.35.0123>

Pindell, J., Villagómez, D., Molina-Garza, R., Graham R., and Weber, B., 2020. A revised synthesis of the rift and drift history of the Gulf of Mexico and surrounding regions in the light of improved age dating of the Middle Jurassic salt. Geological Society, London, Special Publications, 504. <https://doi.org/10.1144/SP504-2020-43>

### **Basins:**

Gómez-Cabrera, P.T. & Jackson, M.P.A. 2009. Regional Neogene Salt Tectonics in the offshore Salina del Istmo Basin, southeastern Mexico, AAPG Memoir, 90, 1-28. http://archives.datapages.com/data/specpubs/memoir90/CHAPTER01/CHAPTER01.HTM

### **Salt Structures:**

*Salt structures have been digitised from a number of publications and also our own interpretation from analysing the high resolution bathymetry.*

Gómez-Cabrera, P.T. & Jackson, M.P.A. 2009. Regional Neogene Salt Tectonics in the offshore Salina del Istmo Basin, southeastern Mexico, AAPG Memoir, 90, 1-28. http://archives.datapages.com/data/specpubs/memoir90/CHAPTER01/CHAPTER01.HTM

Hernández-Mendoza, J.J., Hentz, T.F., DeAngelo, M.V., Wawrzyniec, T.F., Sakurai, S., Talukdar, S.C., and Holtz, M.H., 2008**.** Miocene chronostratigraphy, paleogeography, and play framework of the Burgos Basin, southern Gulf of Mexico. *AAPG Bulletin*, **92** (11), 1501-1535. https://doi.org/10.1306/07070808021

PEMEX, 2013.Provincia Petrolera Golfo de México Profundo. [Accessed Online: August 2014].

Ruiz-Osorio, A.S., 2018.Tectonostratigraphic Evolution and Salt Tectonic Processes of the Isthmus Saline Basin, South-eastern Gulf of Mexico: Implication for Petroleum Systems and Exploration. *Unpublished PhDThesis, Royal Holloway University of London,*281p. https://pure.royalholloway.ac.uk/portal/files/30844661/2018ruizarophd.pdf

Sahling, H., Borowski, C., Escobar-Briones, E., Gaytan-Caballero, A., Hsu, C., Loher, M., MacDonald, I., Marcom, Y., Pape, T., Romer, M., Rubin-Blum, M., Schubotz, F., Smrzka, D., Wegener, G., and Bohrmann, G. 2016.Massive asphalt deposits, oil seepage, and gas venting support abundant chemosyntheic communites at the Campeche Knollls, southern Gulf of Mexico. *Biogeosciences,* **13**, 4491-4512. https://doi.org/10.5194/bg-13-4491-2016

Steier, A., 2018. Jurassic-Cretaceous stratigraphic and structural evolution of the Northern Yucatan margin. Gulf of Mexico Basin. Unpublished MSc thesis, University of Houston. http://hdl.handle.net/10657/3354

Trejo-Vásquez, E. 2008.Caracterizacion teconica – Estrictira; em e; area de studio Kuchle Tuplico, para la evaluacion de Las Trampas estructurales del Play Brecha del Cretacico Superior y del Play Bancos Ooliticos del Jurassico Superior Kimmeridgiano, Mediante la metodologia de Plays Fairway. *Master's Thesis, Universidad Nacional Autonoma de Mexico, Mexico.* 1-173. http://132.248.52.100:8080/xmlui/handle/132.248.52.100/2677

USGS 2004. Salt Diapirs in the Gulf Coast. U.S. Geological Survey, Central Energy Resources Team. Denver, Colorado. [Accessed online: April 2016]. https://catalog.data.gov/dataset/salt-diapirs-in-the-gulf-coast-gcdiapirg-82057/resource/0475baa8-0e43-4b49-8bd5-f66a615ca8b8

### **Shale Structures:**

Ambrose, W.A., Wawrzyniec, T.F., Fouad, K., Talukdar, S.C., Jones, R.H., Jennette, D.C., Holtz, M.H., Sakurai, S., Dutton, S.P., Dunlap, D.B., Guevara, E.H., Meneses Rocha, J., Lugo, J., Aguilera, L., Berlanga, J., Miranda, L., Ruiz Morales, J., Rojas, R. & Solís, H. 2003**.** Geologic framework of upper Miocene and Pliocene gas plays of the Macuspana Basin, southeastern Mexico, *American Association of Petroleum Geologists Bulletin*, **87**, 1411–1435. http://archives.datapages.com/data/bulletns/2003/09sep/1411/IMAGES/03_1411.PDF

Chavez-Valois, V.M., Clara Valdes, .M.d.L., Juarez-Placenica, J.L., Alor-Ortiz, I., Mata-Jurado, M., Villagran-Yanez, R., Guerrero-Tristan, T., and Ghosh, S. 2004. A New Approach of Tertiary Plays in a Multidisciplinary Framework: Sureste Basin, Tabascom Mexico. *Extended Abstract, AAPG International Conference, October 24-27, Cancun, Mexico. http://www.searchanddiscovery.com/pdfz/documents/abstracts/2004intl_cancun/extended/a90976.pdf.html*

Salomón-Mora, L.E., 2013. Structure and tectonics of the salt and shale provinces, Western Gulf of Mexico. PhD Thesis University of Aberdeen. https://ethos.bl.uk/OrderDetails.do?uin=uk.bl.ethos.619168

### **Carbonate Bank:**

Contreras, J., & Suter, M., 2015. Mechanical stability model of progradational carbonate platform margins under tectonic loads: Deformation of Cretaceous carbonate platforms in the Sierra Madre Oriental fold-thrust belt (east central Mexico). Journal of Geophysical Research: Solid Earth. 120. 1288-1308. http://dx.doi.org/10.1002/2014JB011495

ION Geoventures, 2012.YucatánSPAN Brochure. *ION Geoventures website*. [Accessed online: July 2014]. http://www.iongeo.com/content/documents/Resource%20Center/Brochures%20and%20Data%20Sheets/Data%20Sheets/Data%20Library/DS_GEO_YucatanSPAN.pdf

The map is provided “as is”, without warranty of any kind, expressed or implied including without limitations, accuracy, omissions, completeness or implied warranties or suitability or fitness for a particular purpose or other incidental damages arising out of the use or the inability to use the map. You acknowledge that the use of this service is entirely at your own risk.
